# Supplementary material for: Selective extraction of Pd(ii) by p-tert-butylcalix[4]arenedicarboxylic acid
Source: Royal Society of Chemistry journal article supplement (doi:10.1039/c6nj03839e), 2017-01-01
Supplement: c6nj03839e1.pdf [file c6nj03839e1.pdf]

## Supporting Information

### Selective extraction of Pd(II) by *p*-tert-butylcalix[4]arenedicarboxylic acid

N. Morohashi,\* S. Iijima, K. Akasaka and T. Hattori\*

*Department of Biomolecular Engineering, Graduate School of Engineering, Tohoku University,  
6-6-11 Aramaki-Aoba, Aoba-ku, Sendai 980-8579, Japan*

#### Contents:

|     |                                                            |    |
|-----|------------------------------------------------------------|----|
| I.  | <sup>1</sup> H NMR spectral chart for Pd complex <b>6</b>  | S2 |
| II. | <sup>13</sup> C NMR spectral chart for Pd complex <b>6</b> | S3 |

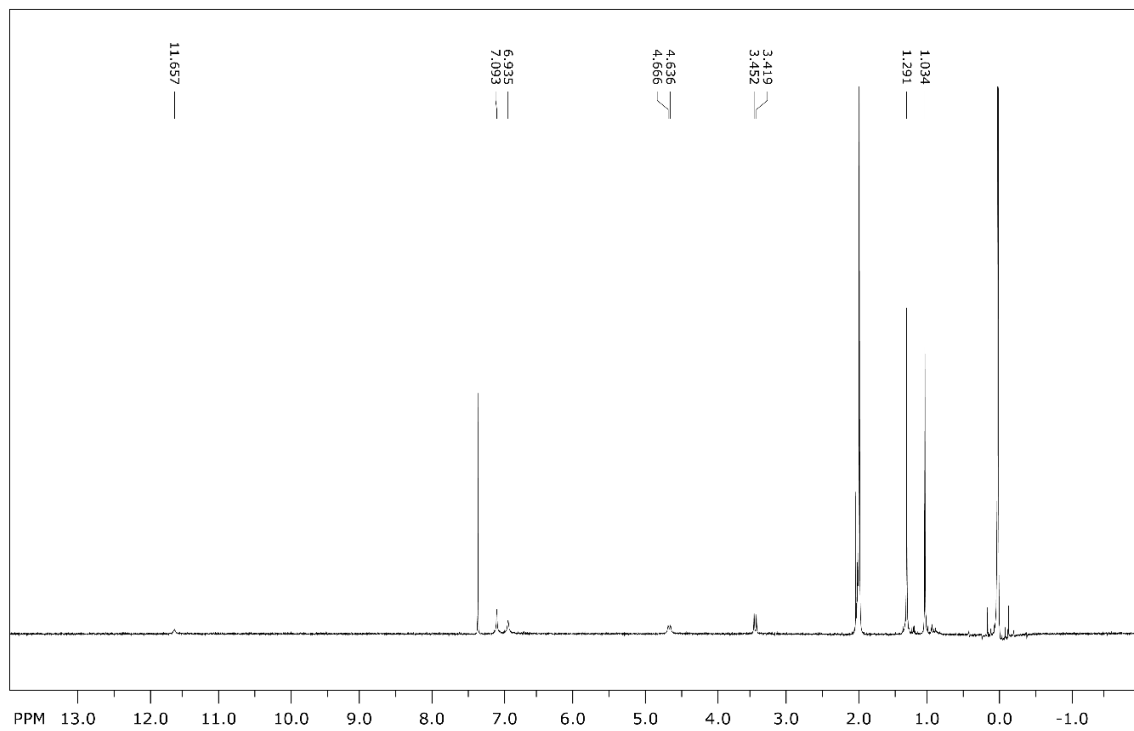

**Figure S1.** <sup>1</sup>H NMR spectral chart for Pd complex **6** (CDCl<sub>3</sub>: CD<sub>3</sub>CN = 5 : 1, 293 K).

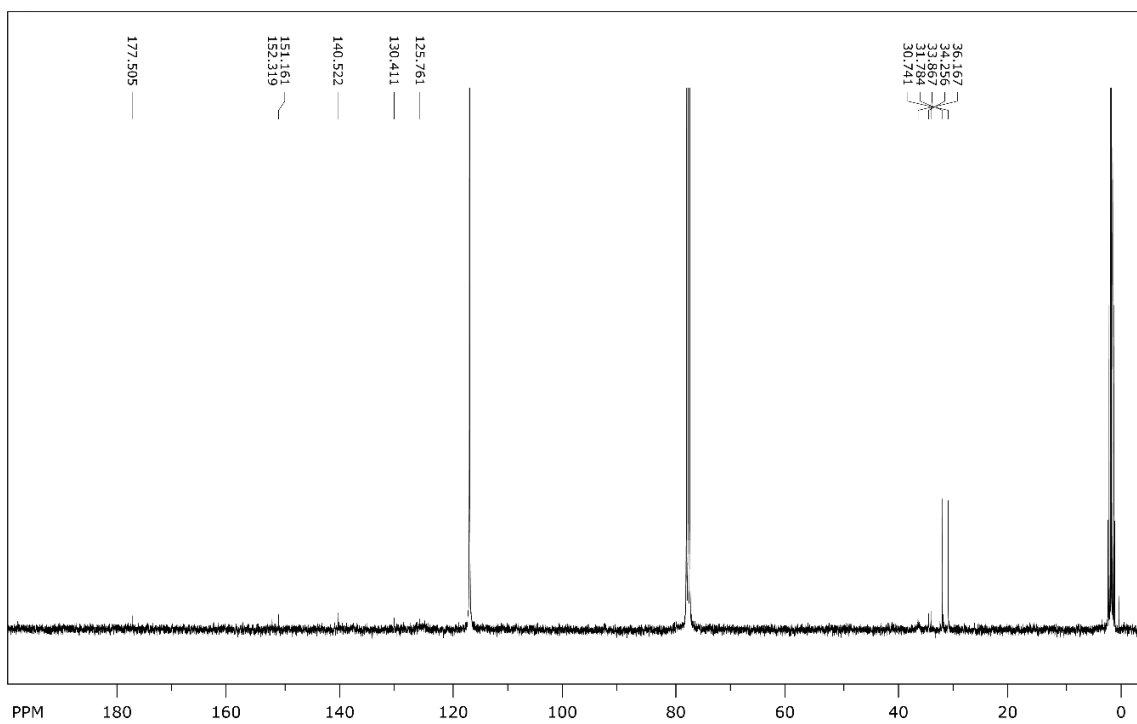

**Figure S2.**  $^{13}\text{C}$  NMR spectral chart for Pd complex **6** ( $\text{CDCl}_3$  :  $\text{CD}_3\text{CN}$  = 5 : 1, 293 K).
